# Supplementary material
Source: publisher figshare collection journal article supplement (https://acs.figshare.com/ndownloader/files/21484293)
Supplement: Supplementary file 1 [file 21484293]

# Supporting Information

## Cell-Selective Cytotoxicity of a Fluorescent Rhodium Metalloinsertor Conjugate Results from Irreversible DNA Damage at Base Pair Mismatches

*Adela Nano,<sup>† #</sup> Julie M. Bailis,<sup>‡ \* #</sup> Natalie F. Mariano,<sup>‡</sup> Elizabeth D. Pham,<sup>‡</sup> Stephanie D. Threatt,<sup>†</sup> and Jacqueline K. Barton<sup>†\*</sup>*

<sup>†</sup> Division of Chemistry and Chemical Engineering, California Institute of Technology, Pasadena, CA 91125

<sup>‡</sup> Department of Oncology Research, Amgen Research, Amgen, Inc., South San Francisco, CA 94080

<sup>#</sup> These authors contributed equally to the work.

\* To whom correspondence should be addressed. Julie M. Bailis, Email:

[jbailis@amgen.com](mailto:jbailis@amgen.com); Telephone: +1 (650) 244 2361, and Jacqueline K. Barton, Email:

[jkbarton@caltech.edu](mailto:jkbarton@caltech.edu); Telephone: +1 (626) 395-6075; Fax: +1 (626) 577-4976.

## Table of Figures

|                                                                                                |           |
|------------------------------------------------------------------------------------------------|-----------|
| <b>Figure S1. <sup>1</sup>H NMR spectrum of RhDPA-Cy3.</b>                                     | <b>3</b>  |
| <b>Figure S2. <sup>13</sup>C NMR spectrum of RhDPA-Cy3.</b>                                    | <b>3</b>  |
| <b>Figure S3. <sup>13</sup>H NMR spectrum of RhPPO-Cy3.</b>                                    | <b>4</b>  |
| <b>Figure S4. TOF-MS ES+ characterization of RhDPA-Cy3.</b>                                    | <b>5</b>  |
| <b>Figure S5. TOF-MS ES+ characterization of RhPPO-Cy3.</b>                                    | <b>6</b>  |
| <b>Figure S6. MS-ESI+ characterization of RhPPO-Cy3 using an LTQ spectrometer.</b>             | <b>7</b>  |
| <b>Figure S7. HPLC trace of RhPPO-Cy3 after purification.</b>                                  | <b>8</b>  |
| <b>Figure S8. Absorption profile of RhPPO-Cy3, and its models Cy3-linker and RhPPO-Hdpa.</b>   | <b>9</b>  |
| <b>Figure S9. Evaluation of cytotoxicity of RhPPO-Cy3 at different time points.</b>            | <b>10</b> |
| <b>Figure S10. RhPPO-Cy3 shows preferential cytotoxicity for MMR-deficient CRC cell lines.</b> | <b>11</b> |
| <b>Figure S11. RhPPO-Cy3 causes DNA damage.</b>                                                | <b>12</b> |

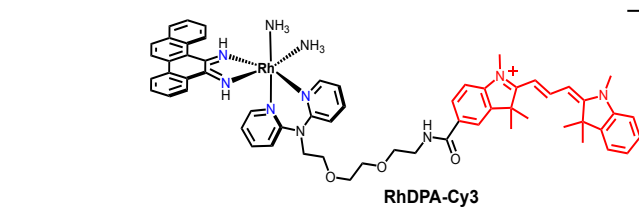

2088

176.88  
175.37  
174.58  
167.50  
160.72  
160.38  
155.21  
155.03  
153.83  
153.48  
151.21  
145.70  
143.35  
143.23  
143.15  
141.66  
140.72  
137.22  
136.26  
136.19  
134.46  
134.23  
131.22  
131.12  
130.74  
130.50  
129.90  
129.42  
128.36  
128.95  
128.49  
126.53  
126.23  
126.17  
123.16  
122.92  
122.89  
122.52  
121.49  
120.81  
119.01  
118.41  
115.72  
112.19  
110.56  
104.20  
102.91  
70.96  
70.36  
70.23  
66.96  
51.93  
50.21  
49.23  
39.75  
32.06  
27.66  
27.40

4+

4Cl<sup>-</sup>

RhDPA-Cy3

S3

**Figure S2.**  $^{13}\text{C}$  NMR spectrum of RhDPA-Cy3. The spectrum was collected in deuterated acetonitrile at room temperature

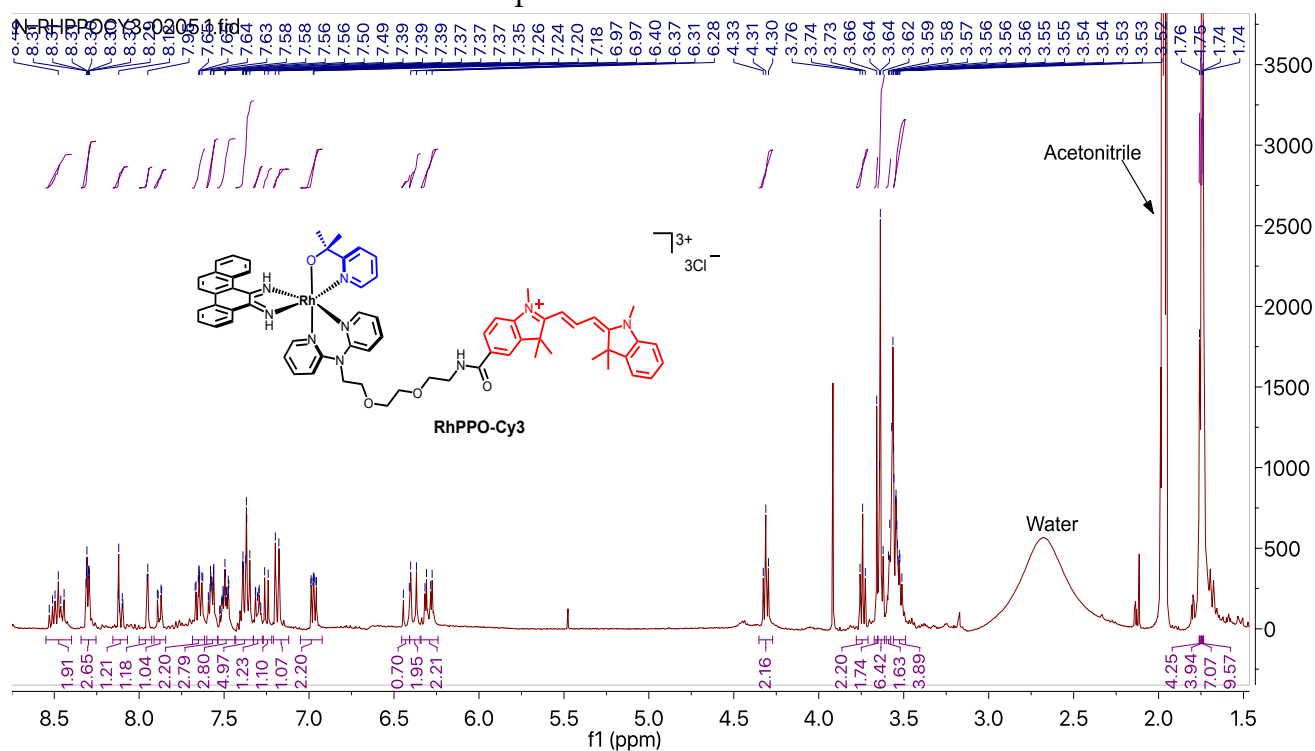



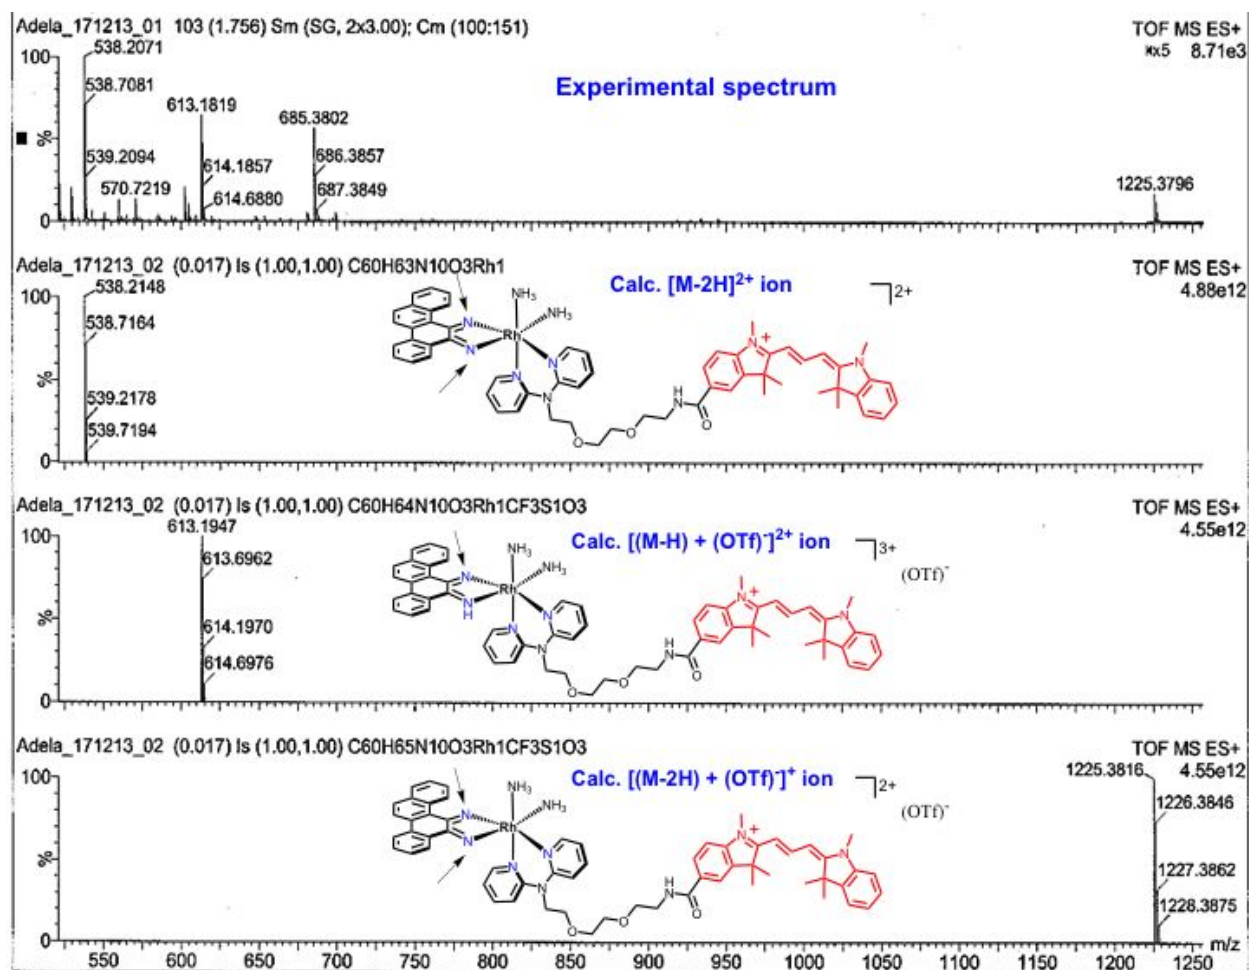

**Figure S4.** TOF-MS ES<sup>+</sup> characterization of RhDPA-Cy3. (Upper) Experimental spectrum of RhDPA-Cy3; (Lower) Calculated spectra for  $m/z$  538.2; 613.1; 1225.3. When the spectrum was recorded, the compound was not anion exchanged to its chloride salt. Therefore, we observe the triflate salt in the experimental spectrum.

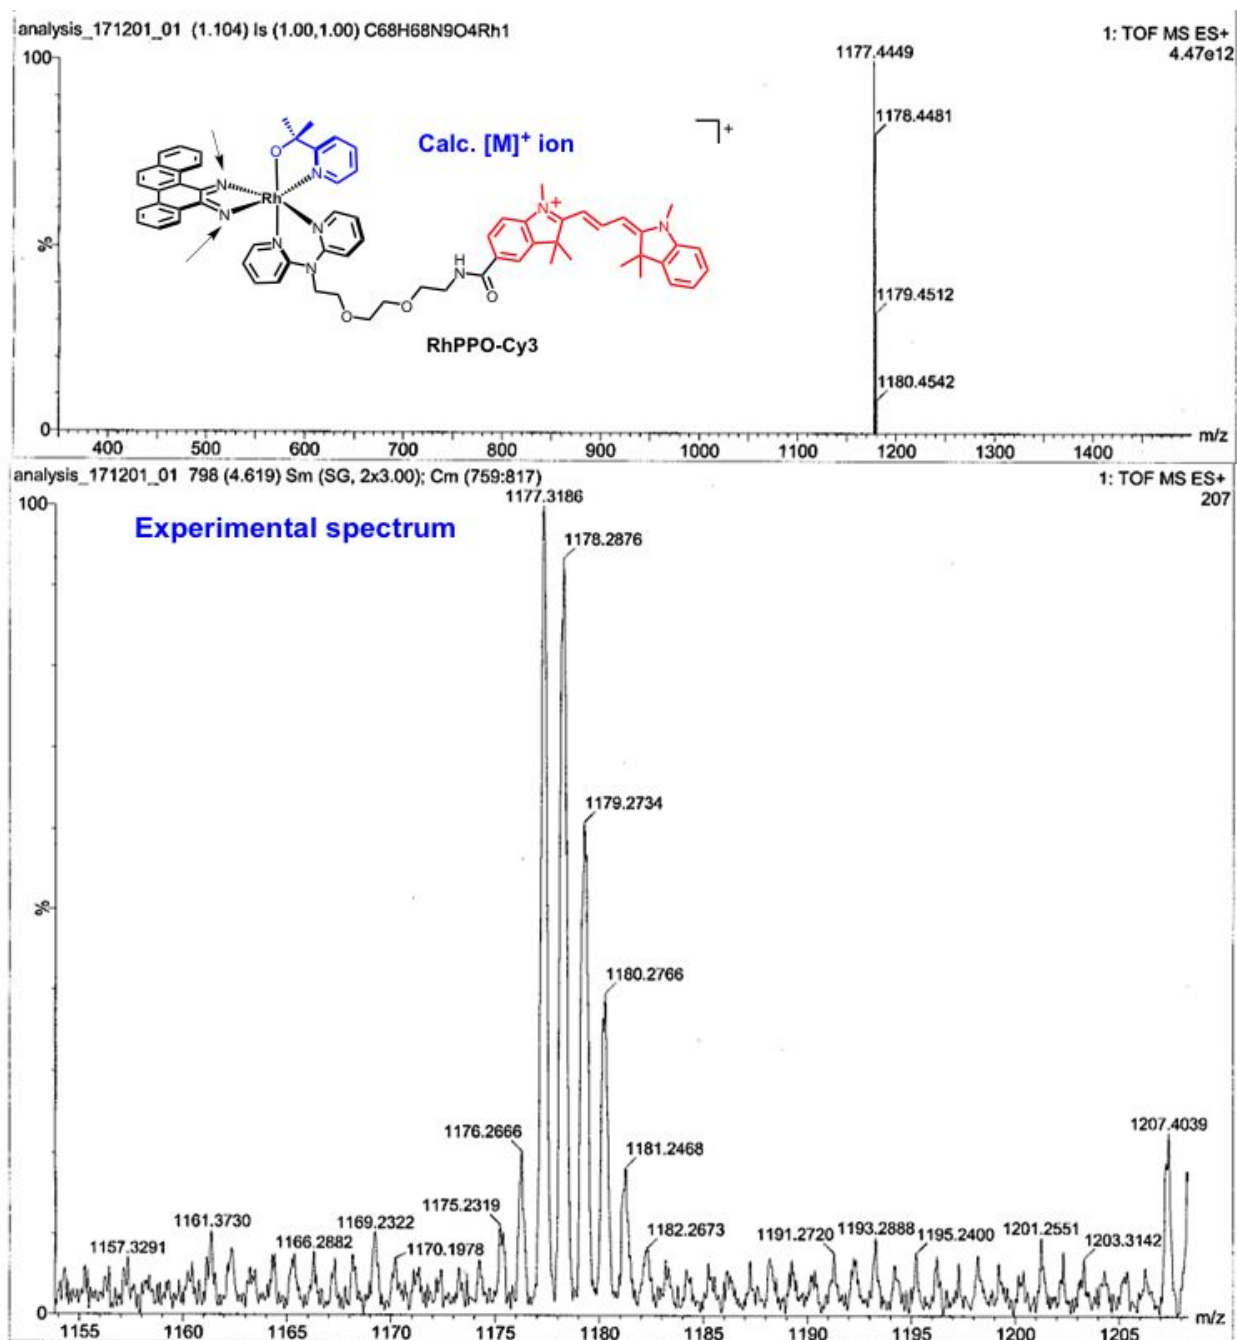

**Figure S5.** TOF-MS ES<sup>+</sup> characterization of RhPPO-Cy3. (Upper) Calculated  $m/z$  = 1177.4449 for [M – 2H]<sup>+</sup>; (Lower) Experimental spectrum with  $m/z$  = 1177.3186. [M – 2H]<sup>+</sup> is assigned to the complex with both imines deprotonated, indicated with an arrow in the chemical structure.

rhppocy-hplc-30\_180731215207 #1-20 RT: 0.00-0.07 AV: 20 NL: 9.46E5  
T: ITMS + p ESI Full ms [150.00-2000.00]

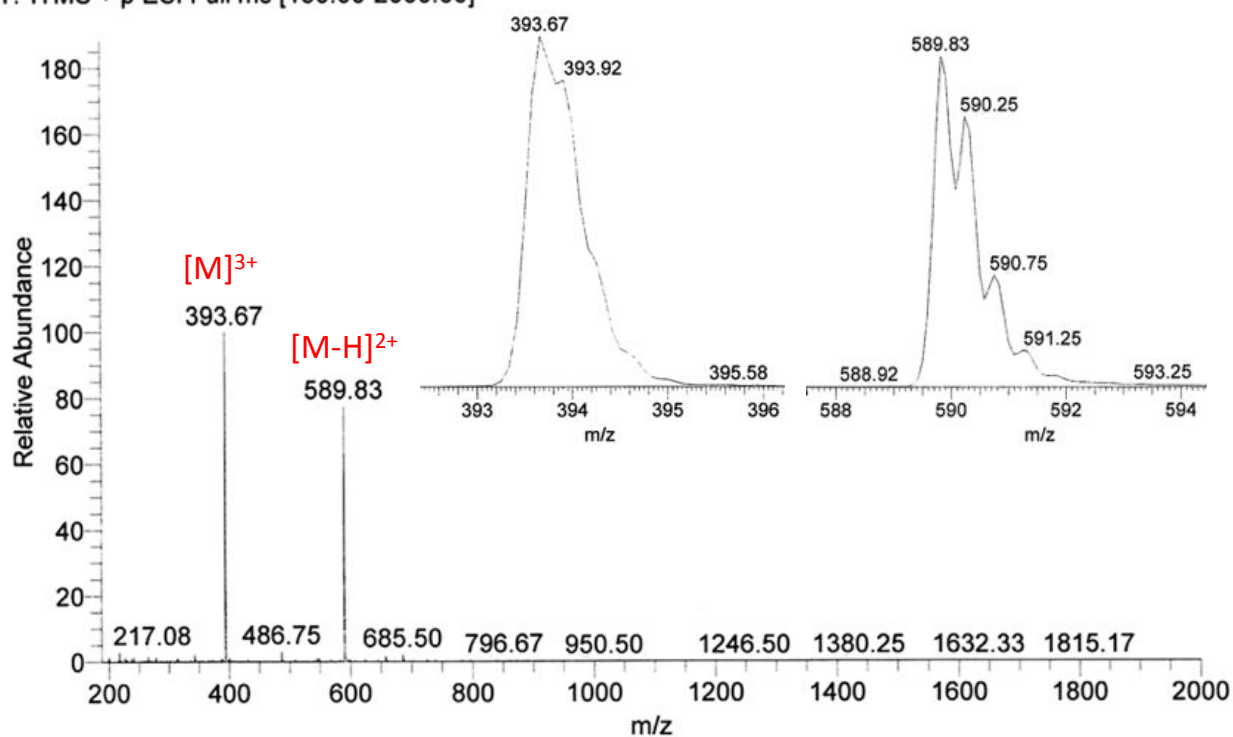

**Figure S6.** MS-ESI<sup>+</sup> characterization of RhPPO-Cy3 using an LTQ spectrometer. The spectrum was recorded after HPLC purification of RhPPO-Cy3. Insets are zooms of  $m/z$  393.67 and  $m/z$  589.83 peak;  $m/z$  393.67 (100%) corresponds to  $[M]^{3+}$  (both imines on chrysi ligand are protonated);  $m/z$  589.83 (77%) corresponds to  $[M - H]^{2+}$  (only one imine is protonated).



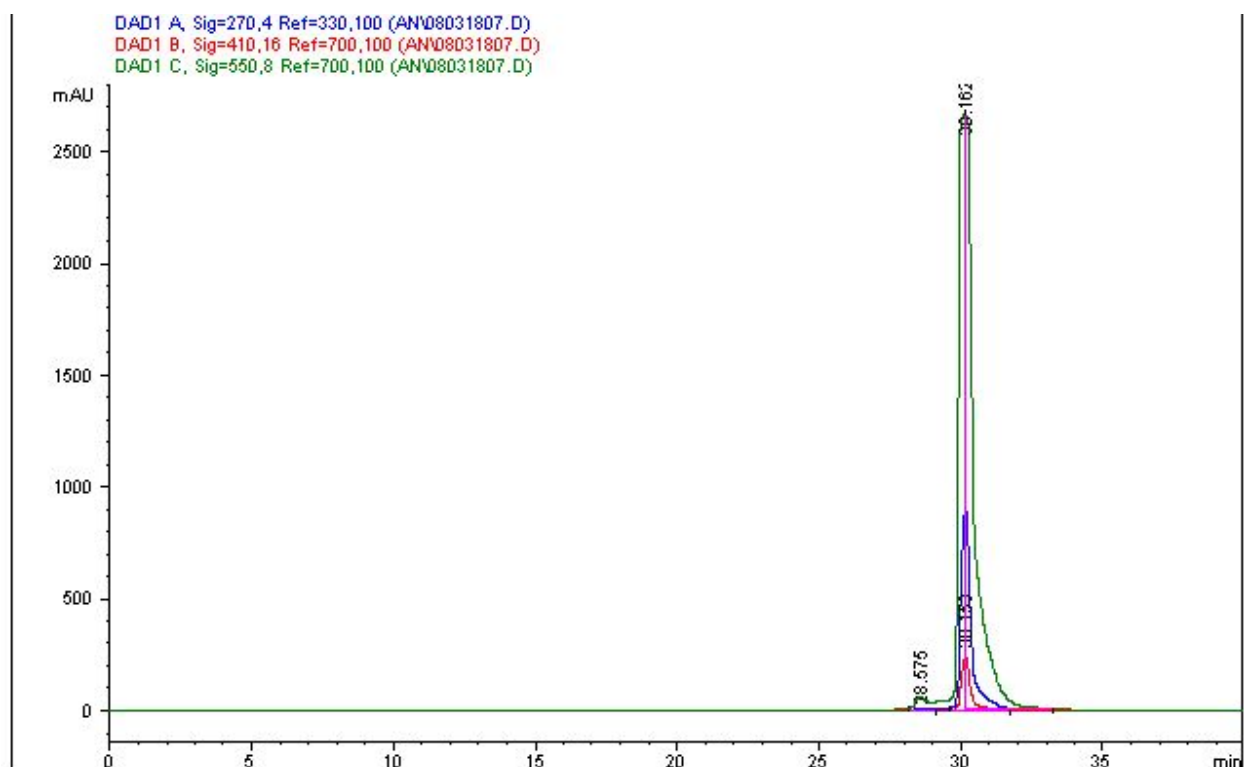

**Figure S7.** HPLC trace of RhPPO-Cy3 after purification. The HPLC purification was followed using three different wavelengths: at 270 nm, 410 nm (marking the absorption of rhodium complex center), and 550 nm (marking the absorption of Cy3 dye). Mobile phase: 85/15 to 50/50 to 85/50 (0.1% trifluoroacetic acid in water)/acetonitrile eluting over 40 minutes.

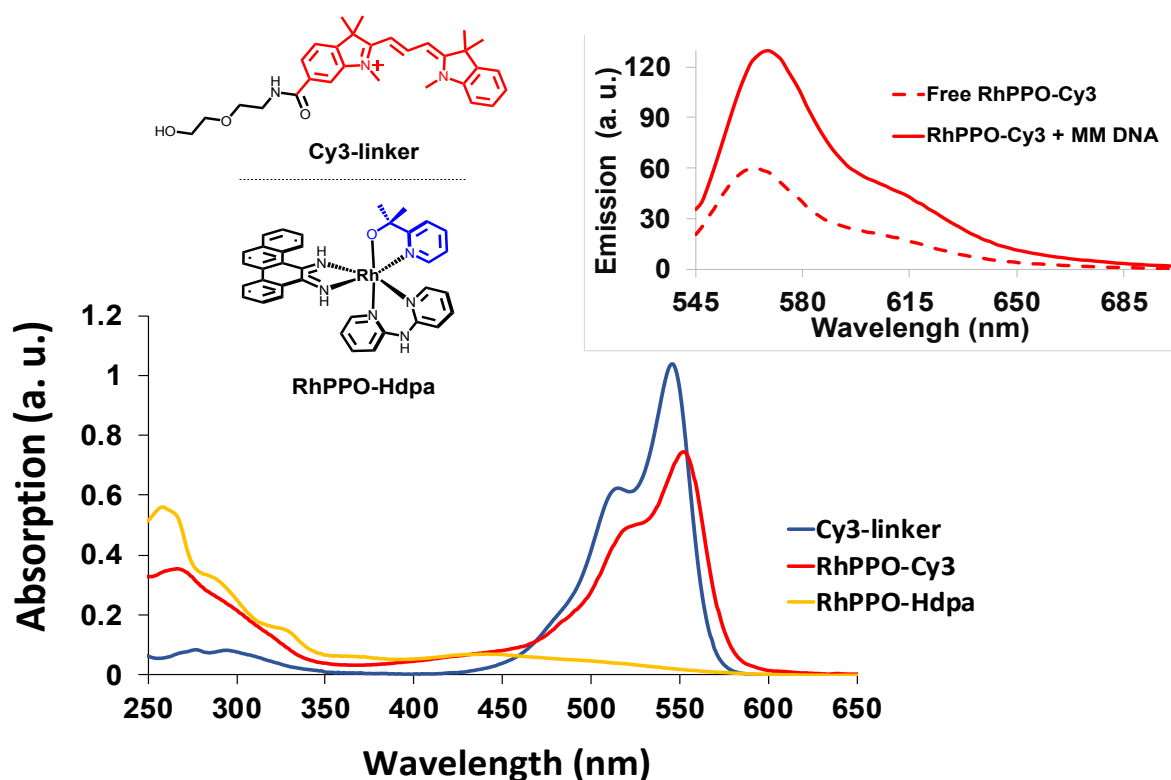

**Figure S8.** Absorption profile of RhPPO-Cy3, and its models Cy3-linker and RhPPO-Hdpa. Spectra collected in Tris buffer (5mM Tris, 200 mM NaCl, pH 7.4) at room temperature. [RhPPO-Cy3]; [Cy3-linker]; [RhPPO-Hdpa] = 10  $\mu$ M. Absorption maxima for RhPPO-Cy3 (in Tris 5 mM, 200 mM NaCl, pH 7.4):  $\lambda(552\text{nm})$   $\epsilon = 61,000 \text{ M}^{-1} \text{ cm}^{-1}$ ;  $\lambda(267\text{nm})$   $\epsilon = 28,000 \text{ M}^{-1} \text{ cm}^{-1}$ . Inset: Emission of RhPPO-Cy3 at 1 $\mu$ M free in Tris buffer solution (5mM Tris, 200 mM NaCl, pH 7.4) with  $\lambda_{\text{max}} = 565 \text{ nm}$ , or in the presence of 1

eq. MM dsDNA with  $\lambda_{\text{max}} = 570$  nm. The synthesis and characterization of RhPPO-Hdpa and Cy3-linker have been previously reported.<sup>1,2</sup>

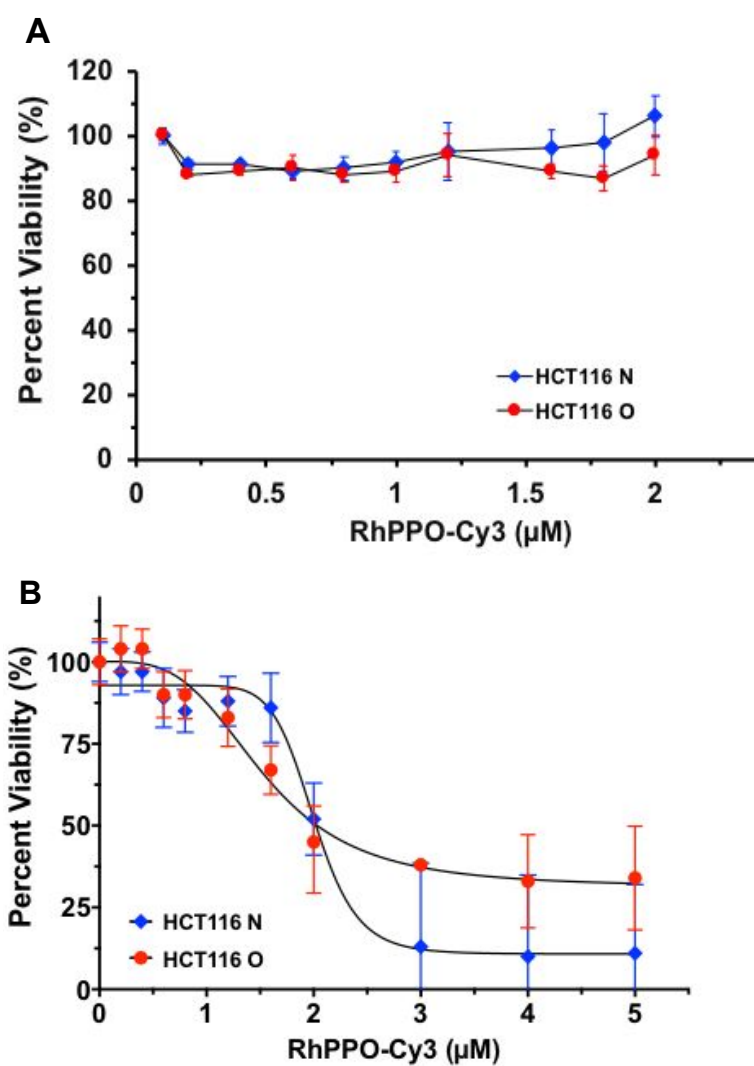

**Figure S9.** Evaluation of cytotoxicity of RhPPO-Cy3 at different time points. The cells were treated with RhPPO-Cy3 at the concentrations indicated, and then cell viability was assessed with a Cell Titer-glo assay. (A) Dose response curve of cell viability assessed after 24 hours incubation with RhPPO-Cy3; (B) dose response curve assessed after 48 hours incubation with RhPPO-Cy3. Error bars are representative of three replicates.

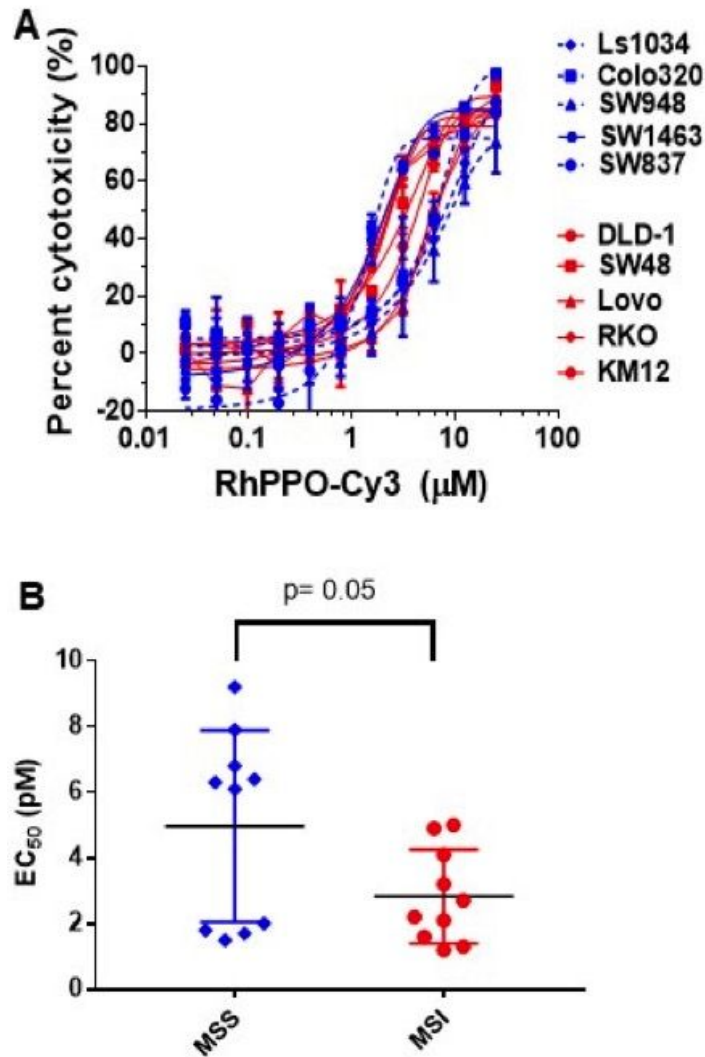

**Figure S10.** RhPPO-Cy3 shows preferential cytotoxicity for MMR-deficient CRC cell lines. A panel of MMR-deficient and MMR-proficient CRC cell lines was treated with RhPPO-Cy3 in a dose response. After 72 hours incubation, cell viability was assessed with a Cell Titer-glo assay. Duplicate samples were analyzed in each experiment. (A) Dose response curves from a representative experiment are shown. In blue are MSS cell lines; in red are MSI cell lines. (B) Comparison of  $\text{EC}_{50}$  values for the MSS and MSI cell lines.

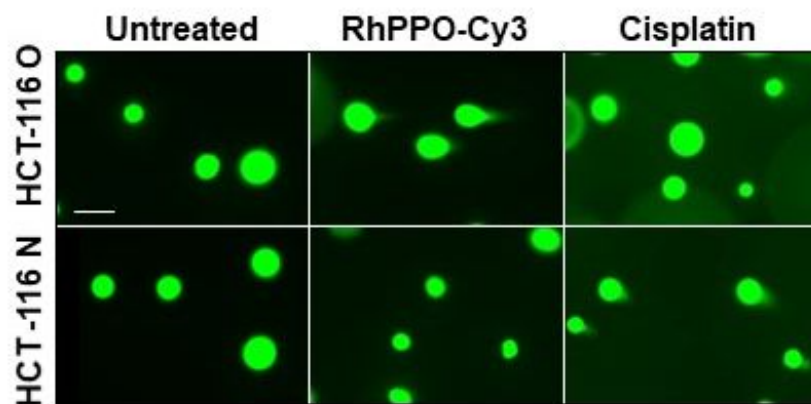

**Figure S11.** RhPPO-Cy3 causes DNA damage. HCT-116 O and HCT-116 N cells were treated with 5  $\mu$ M RhPPO-Cy3 or cisplatin for 24 hours, and then analyzed for DNA damage using a neutral Comet assay. Cells were embedded in agarose, denatured and analyzed by TBE gel electrophoresis. Cell nuclei and comet tails were visualized with a Vista Green fluorescent dye. Representative images are shown. Scale bar, 20  $\mu$ M.

## REFERENCES

1. Boyle, K. M.; Barton, J. K. (2018) A Family of Rhodium Complexes with Selective Toxicity toward Mismatch Repair-Deficient Cancers. *J. Am. Chem. Soc.* 140, 5612-5624.
2. Nano, A.; Boynton, A.; Barton, J.K. (2017) A Rhodium-Cyanine Fluorescent Probe: Detection and Signaling of Mismatches in DNA. *J. Am. Chem. Soc.* 139, 17301-17304.
